# Supplementary material
Source: Research Square preprint supplement (doi:10.21203/rs.3.rs-9240636/v1)
Supplement: Supplementary file 1 [file 14045ad33960425e60655338.docx]

Table S1 The primer sequence

| Gene | forward | reverse |
| --- | --- | --- |
| AKR7A3 | 5'-ATGAGGACAAGAATGGGAAACA-3' | 5'-GCAATGCCCTCAAAGTGGT-3' |
| GAPDH | 5'-TGTCAAGCTCATTTCCTGGTATG-3' | 5'-TCTCTCTTCCTCTTGTGCTCTTG-3' |

Table S2 Analysis for genotypes of candidate SNPs

| SNPs | Group | | OR (95% CI) | *P* |
| --- | --- | --- | --- | --- |
| Control | Case |
| rs1738023 |  |  |  |  |
| Additive |  |  |  |  |
| CC | 186 | 90 | 1 | 0.002 |
| TC | 91 | 15 | 0.034(0.19-0.62) | 0.000449 |
| TT | 32 | 0 | / | 0.997701 |
| Dominant |  |  |  |  |
| CC | 186 | 90 | 1 | 0.000005 |
| TC+TT | 123 | 15 | 0.25(0.14-0.46) |  |
